# Supplementary material
Source: publisher site journal article supplement (https://www.dovepress.com/article/464787)
Supplement: Supplementary file 1 [file get_supplementary_file.php]

**Supplementary Material**


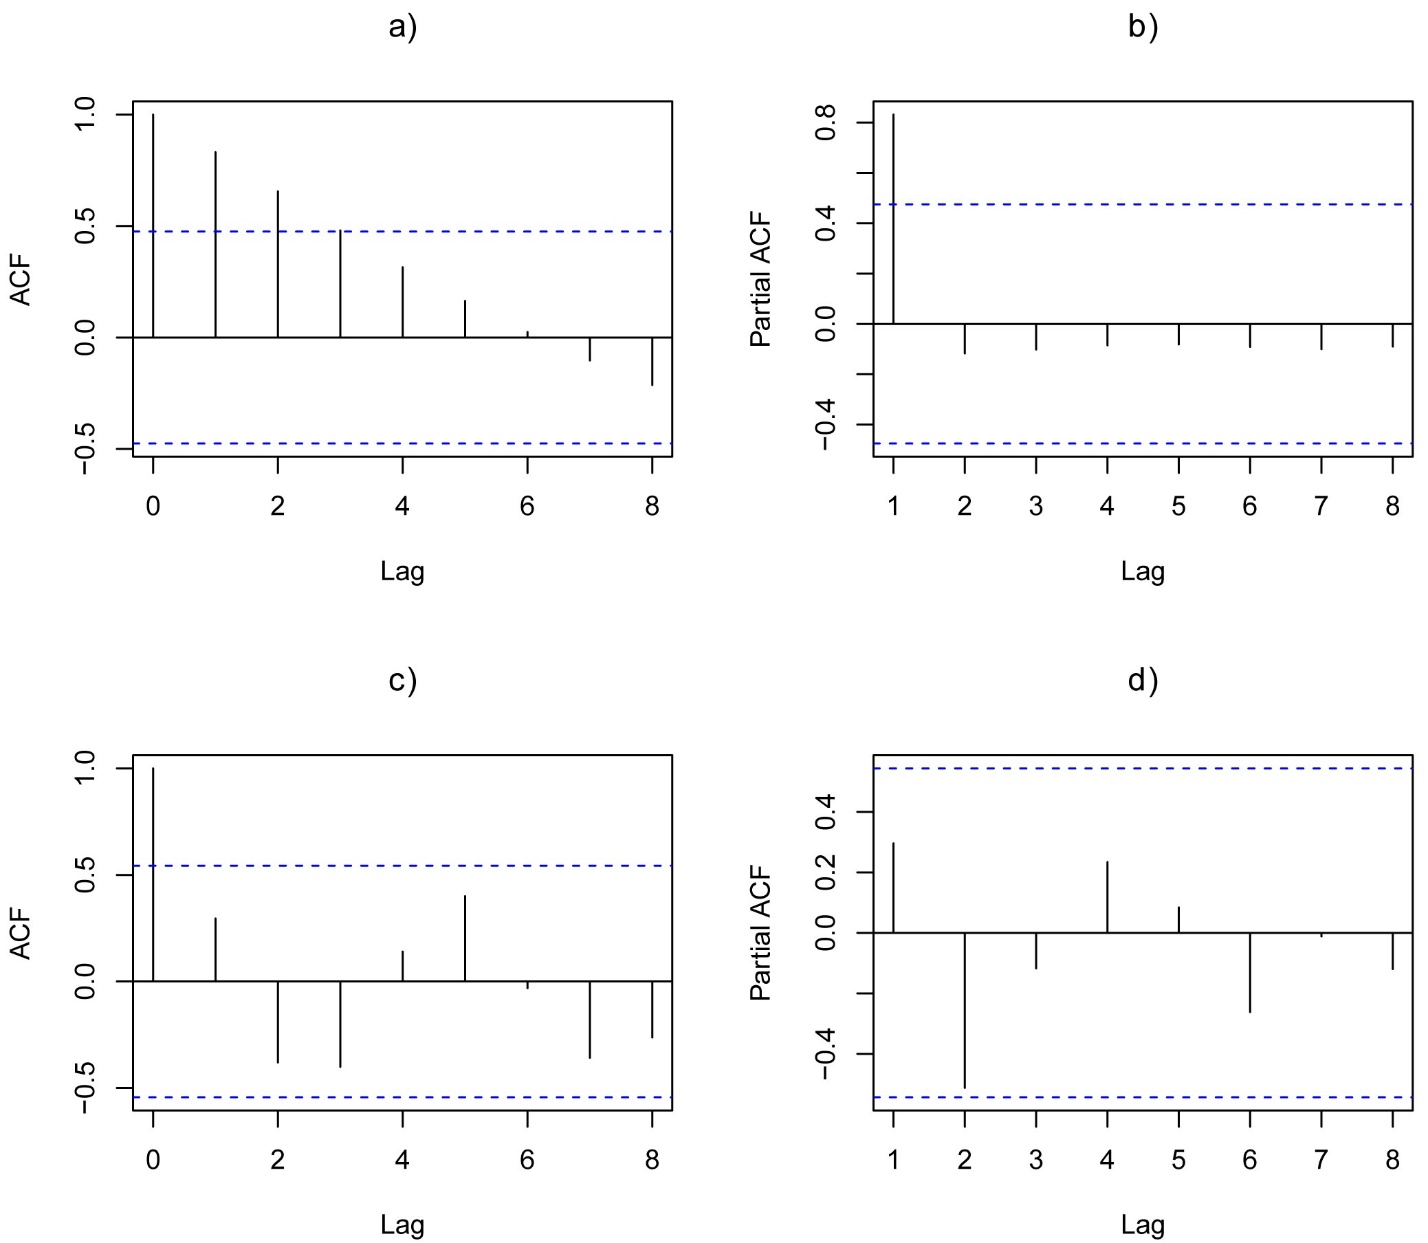


**Fig S1**: a) Sample autocorrelation function (ACF), b) sample partial autocorrelation function (PACF), c) smoothed autocorrelation function and d) smoothed partial autocorrelation function plots


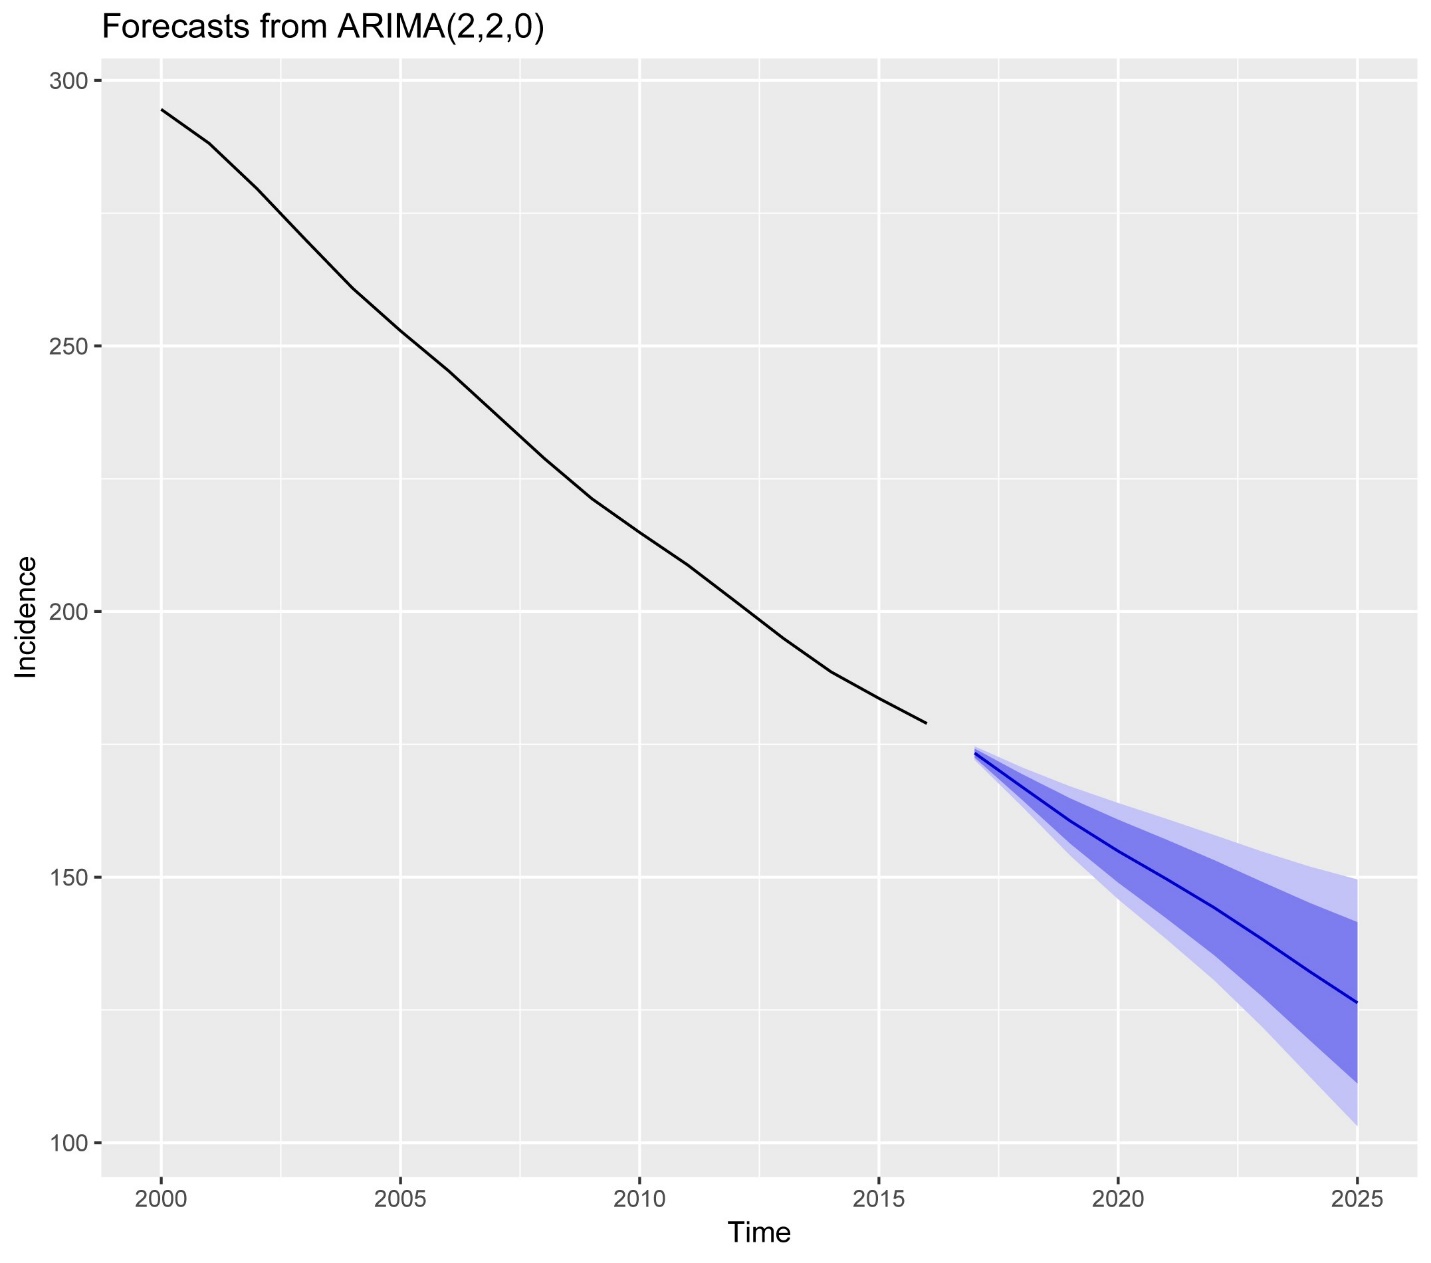


**Fig S2**. One-step ARIMA forecasts computed using rolling origin cross-validation (January 2000 to December 2016); ARIMA= autoregressive integrated moving average.

**R Scripts**

# Arima Time series analysis

> library(tseries)

> library(fpp2)

> library(forecast)

> attach(TB_2000)

> TB<-window(ts(TB_2000$Tbinci,start = 2000))

> # Number of observations

> obs<-14

> # Forecast horizon and define number of origins

> h<-1

> origins<-3

> datavalues <- setNames(vector("list",3),

+ c("actuals", "holdout","mean"))

> datavalues$actuals<-TB

> datavalues$holdout<-

+ datavalues$mean<- matrix(NA, h, origins,

+ dimnames = list(paste0("h",1:h),

+ paste0("origin",1:origins)))

> for (i in 1:origins) {

+ # fit the model

+ testmodel <-auto.arima(TB[1:(obs+i-origins-h)])

+ # drop the in sample observations and extract the first h observations

+ datavalues$holdout[,i] <- head(TB[-c(1:(obs-origins+i-h))], h)

+ # Produce forecast and write down the mean values

+ datavalues$mean[,i] <-forecast(testmodel, h=h)$mean

+ }

> datavalues$holdout

> # Get the forecast values

> datavalues$mean

> # Measure the forecast Accuracy

> # Calculate Errors

> errors<- datavalues$holdout-datavalues$mean

> errors

> boxplot(errors)

> library(MLmetrics)

> ME<-apply(errors,2,mean)

> RMSE<-sqrt(apply(errors^2,2,mean))

> MAE<-apply(abs(errors),2,mean)

> MAPE<- mean(abs(errors/datavalues$holdout) * 100)

> res<-rbind(ME,RMSE, MAE,MAPE)

> print(res)

> # Lets check the choosen data set (200-2016) option1

> library(tseries)

> TB<-window(ts(TB_2000$Tbinci,start = 2000))

> View(TB)

> train_best<-window(TB,end= 2016)

> par(mar = c(2,2,2,2))

> # common marigin

> par(mar = c(5.1,4.1, 4.1, 2.1))

> plot(TB,xlab ="Year",main= "Incidence",

+ ylim = c(150,300),col="red",lwd=2)

> adf.test(train_best)

> par(mfrow=c(2,2))

> par(mar = c(5.1,4.1, 4.1, 2.1))

> plot(train_best)

> acf(train_best, lag.max=8, main= "a)")

> pacf(train_best, lag.max=8, main= "b)")

> a<-diff(train_best, differences = 2)

> plot(a)

> adf.test(a)

> pacf(a, lag.max=8, main= "d)")

> auto.arima(train_best)

> fit.a<- auto.arima(train_best)

> summary(fit.a)

> hist(fit.a$residuals)

> checkresiduals(fit.a)

> autoplot(fit.a$residuals)

> Box.test(fit.a$residuals)

> autoplot(forecast(fit.a, h=9), lwd=2)

> autoplot(forecast(fit.a, h=9, xlab="Year", ylab="Incidence"))

## SEIRD model with demographics

> # **********************

> # During the war: SEIRD Model prediction

> library(deSolve)

> require(deSolve)

> SEIRD <- function(time, current_state, params){

+ with(as.list(c (current_state, params)),{

+ N <- S+E+I+R+M

+ dS <- ((phi)-(beta*S*I)/N -(mu*S)) +(gamma2*I+gamma1*E)

+ dE <- (0.95*(beta*S*I)/N) - (sigma*E) - (gamma1*E)-(mu*E)

+ dI <- (0.05*(beta*S*I)/N)+(sigma*E) - (gamma2*I) - (nu*I)-(mu*I)

+ dR <- (gamma2*I)+(gamma1*E) -(mu*R)

+ dM <- (mu*S) +(mu*E) + (mu*I) + (nu*I)+ (mu*R)

+

+ return (list(c (dS, dE, dI, dR, dM)))

+ })

+ }

> params <- c (phi= 0.03, mu=0.032, beta=0.3,

+ sigma=0.05, gamma1=0.19, gamma2=0.5, nu=0.389)

> initial_state <- c(S=4252965, E=1949713, I=11076, R=7088, M=1630)

> times <- 0:5

> mode.fit <- ode(initial_state, times, SEIRD, params)

> summary(mode.fit)

# exporting model out put as csv

| > write.csv(mode.fit, "SEIR.fit data.csv") |
| --- |
